# Supplementary material
Source: Atypon-hosted journal article supplement (https://static.yanyin.tech/literature/current_protocol/10.1002/cpz1.898/attachments/downloadSupplement)
Supplement: downloadSupplement [file downloadSupplement]

## Sheet: Sheet1
Total Prep Volume mL	Flow Rate Ratio (aq:organic)	N/P	# ionisble amines
1	3	4	1
Lipid	Molecular weight gmol-1	mol%	Stock volume µL
DSPC	790.161	10	33.6775
Cholesterol	386.65	38.5	63.4458
MC3	642.1	50	136.835
DMG-PEG2000	2509.2	1.5	16.0417
	Average molecualr weight gmol-1	Total	Total Volume Organic µL
	586.564	100	250
Total Aqueous Volume mL	mass mRNA µg	mRNA Concentration µg/mL
0.75	181.14	241.519
